# Supplementary material for: Genome-wide variant analysis of simplex autism families with an integrative clinical-bioinformatics pipeline
Source: PubMed Central journal article supplement — Cold Spring Harb Mol Case Stud. 2015 Oct;1(1):a000422. doi: 10.1101/mcs.a000422 (PMC4850892; doi:10.1101/mcs.a000422), 2015-10
Supplement: supp_1.1.a000422_Supplemental_Table1_Intergenic_variants.pdf [file supp_1.1.a000422_Supplemental_Table1_Intergenic_variants.pdf]

**Supplemental table 1.  
Intergenic Variants for each Pedigree**

| Family    | Chromosome | Start     | End       | Ref                                                                                                                      | Alt      | CADD score |
|-----------|------------|-----------|-----------|--------------------------------------------------------------------------------------------------------------------------|----------|------------|
| SSC_12605 | chr18      | 56296796  | 56296801  | CACACA                                                                                                                   | -        | 20.8       |
| SSC_12605 | chr1       | 22862796  | 22862796  | T                                                                                                                        | C        | 22.4       |
| SSC_12605 | chr11      | 11228877  | 11228877  | A                                                                                                                        | G        | 26.3       |
| SSC_12605 | chr20      | 37967464  | 37967464  | C                                                                                                                        | G        | 25.7       |
| SSC_12605 | chr1       | 219547206 | 219547207 | AA                                                                                                                       | -        | 23.4       |
| SSC_12605 | chr1       | 97159431  | 97159432  | TT                                                                                                                       | -        | 21.6       |
| SSC_12605 | chr11      | 79222737  | 79222737  | -                                                                                                                        | ACACACAT | 25.5       |
| SSC_12605 | chr13      | 88766728  | 88766729  | TC                                                                                                                       | -        | 20.8       |
| SSC_12605 | chr2       | 121269539 | 121269539 | A                                                                                                                        | -        | 20.3       |
| SSC_12605 | chr7       | 145605410 | 145605410 | A                                                                                                                        | -        | 21.4       |
| SSC_12605 | chr1       | 83889368  | 83889368  | C                                                                                                                        | T        | 23         |
| SSC_12605 | chr14      | 97431801  | 97431801  | A                                                                                                                        | T        | 21         |
| SSC_12605 | chr16      | 73924770  | 73924770  | A                                                                                                                        | C        | 20.4       |
| SSC_12605 | chr17      | 25783776  | 25783776  | G                                                                                                                        | A        | 21.1       |
| SSC_12605 | chr2       | 174526700 | 174526700 | A                                                                                                                        | T        | 24.9       |
| SSC_12605 | chr3       | 18950958  | 18950958  | G                                                                                                                        | A        | 21.4       |
| SSC_12605 | chr3       | 88859609  | 88859609  | C                                                                                                                        | A        | 22.5       |
| SSC_12605 | chr5       | 121878403 | 121878403 | A                                                                                                                        | T        | 20.9       |
| SSC_12605 | chr5       | 163435978 | 163435978 | C                                                                                                                        | A        | 20.5       |
| SSC_12605 | chr5       | 170260699 | 170260699 | C                                                                                                                        | T        | 20.3       |
| SSC_12605 | chr6       | 57564457  | 57564457  | T                                                                                                                        | G        | 20.1       |
| SSC_12605 | chr8       | 106076378 | 106076378 | T                                                                                                                        | G        | 21         |
| SSC_12605 | chr9       | 112286567 | 112286567 | A                                                                                                                        | T        | 21.3       |
| SSC_12605 | chr9       | 132190884 | 132190884 | C                                                                                                                        | T        | 20.5       |
| SSC_12605 | chr9       | 27670625  | 27670625  | A                                                                                                                        | G        | 29.3       |
| SSC_12605 | chr11      | 115803295 | 115803300 | CAATCA                                                                                                                   | T        | 24.9       |
| SSC_12605 | chr2       | 153153402 | 153153488 | ATGTTTCT<br>CTGTTGA<br>AAGAAAT<br>GCTATGC<br>CTTTGTGA<br>AAATTGC<br>CATTCTGT<br>AAAAGTA<br>CTACTGA<br>AGAATAG<br>GACTCTG | -        | 23.8       |

|           |       |           |           | CTAAGGA                             |   |      |
|-----------|-------|-----------|-----------|-------------------------------------|---|------|
| SSC_12605 | chr5  | 91090315  | 91090316  | CA                                  | T | 20.1 |
| SSC_12605 | chr6  | 106357487 | 106357509 | GTGCATG<br>GCTGTGT<br>TTCAATAA<br>A | - | 22   |
| SSC_12605 | chr8  | 132824962 | 132824975 | GTGTGTG<br>TGTGTGT                  | - | 21.7 |
| SSC_12605 | chr1  | 88929834  | 88929834  | A                                   | T | 23.3 |
| SSC_12605 | chr10 | 58879722  | 58879722  | A                                   | G | 24   |
| SSC_12605 | chr10 | 60606856  | 60606856  | T                                   | A | 23.9 |
| SSC_12605 | chr10 | 63403543  | 63403543  | C                                   | A | 20.5 |
| SSC_12605 | chr10 | 71303491  | 71303491  | A                                   | G | 23.7 |
| SSC_12605 | chr11 | 124716092 | 124716092 | C                                   | T | 26.2 |
| SSC_12605 | chr11 | 15780647  | 15780647  | G                                   | A | 20.3 |
| SSC_12605 | chr11 | 15861794  | 15861794  | G                                   | T | 20.9 |
| SSC_12605 | chr11 | 81529166  | 81529166  | A                                   | G | 24.8 |
| SSC_12605 | chr12 | 127097187 | 127097187 | T                                   | C | 22   |
| SSC_12605 | chr13 | 112225526 | 112225526 | C                                   | T | 27.5 |
| SSC_12605 | chr14 | 25971418  | 25971418  | A                                   | G | 24.4 |
| SSC_12605 | chr14 | 28712495  | 28712495  | C                                   | G | 23.8 |
| SSC_12605 | chr14 | 57207364  | 57207364  | T                                   | C | 23.2 |
| SSC_12605 | chr14 | 59545027  | 59545027  | G                                   | A | 21   |
| SSC_12605 | chr14 | 83287826  | 83287826  | T                                   | C | 21.3 |
| SSC_12605 | chr14 | 83347284  | 83347284  | T                                   | A | 23.4 |
| SSC_12605 | chr15 | 57619867  | 57619867  | A                                   | G | 29   |
| SSC_12605 | chr15 | 62055088  | 62055088  | G                                   | T | 20.1 |
| SSC_12605 | chr15 | 72892707  | 72892707  | G                                   | A | 22.9 |
| SSC_12605 | chr17 | 14584777  | 14584777  | G                                   | T | 20.7 |
| SSC_12605 | chr18 | 45326973  | 45326973  | G                                   | A | 20.2 |
| SSC_12605 | chr18 | 67037686  | 67037686  | G                                   | C | 20.9 |
| SSC_12605 | chr2  | 122728041 | 122728041 | A                                   | G | 25.3 |
| SSC_12605 | chr2  | 126951391 | 126951391 | T                                   | C | 24.6 |
| SSC_12605 | chr2  | 138864352 | 138864352 | T                                   | C | 23.7 |
| SSC_12605 | chr2  | 147340830 | 147340830 | A                                   | T | 24.5 |
| SSC_12605 | chr2  | 148113998 | 148113998 | C                                   | T | 25.5 |
| SSC_12605 | chr2  | 156118240 | 156118240 | A                                   | G | 22.7 |
| SSC_12605 | chr2  | 2832756   | 2832756   | G                                   | A | 21.4 |
| SSC_12605 | chr20 | 11017899  | 11017899  | G                                   | A | 25.4 |
| SSC_12605 | chr20 | 5279049   | 5279049   | T                                   | C | 26.6 |
| SSC_12605 | chr20 | 5279051   | 5279051   | T                                   | C | 27.4 |
| SSC_12605 | chr3  | 190806183 | 190806183 | G                                   | T | 25.6 |

|           |       |           |           |   |   |      |
|-----------|-------|-----------|-----------|---|---|------|
| SSC_12605 | chr3  | 65290074  | 65290074  | T | C | 23.7 |
| SSC_12605 | chr4  | 112669550 | 112669550 | T | C | 32   |
| SSC_12605 | chr4  | 112736297 | 112736297 | T | G | 22.6 |
| SSC_12605 | chr4  | 118823288 | 118823288 | T | C | 21.8 |
| SSC_12605 | chr4  | 130168145 | 130168145 | T | C | 28.4 |
| SSC_12605 | chr4  | 130443766 | 130443766 | G | A | 24.8 |
| SSC_12605 | chr4  | 147575215 | 147575215 | T | G | 22.5 |
| SSC_12605 | chr4  | 149381748 | 149381748 | A | C | 21.3 |
| SSC_12605 | chr4  | 169969161 | 169969161 | A | C | 20.4 |
| SSC_12605 | chr4  | 17252272  | 17252272  | C | T | 22   |
| SSC_12605 | chr4  | 18180348  | 18180348  | G | A | 21.9 |
| SSC_12605 | chr4  | 22881303  | 22881303  | T | C | 27.6 |
| SSC_12605 | chr4  | 67841685  | 67841685  | T | C | 21.5 |
| SSC_12605 | chr5  | 124316013 | 124316013 | G | C | 22   |
| SSC_12605 | chr5  | 30453417  | 30453417  | A | G | 20.5 |
| SSC_12605 | chr5  | 86837724  | 86837724  | A | G | 21.3 |
| SSC_12605 | chr5  | 86870158  | 86870158  | G | A | 21.9 |
| SSC_12605 | chr5  | 87009307  | 87009307  | C | T | 21   |
| SSC_12605 | chr5  | 87296764  | 87296764  | C | T | 25.3 |
| SSC_12605 | chr5  | 87343056  | 87343056  | A | C | 22.7 |
| SSC_12605 | chr5  | 94682116  | 94682116  | A | C | 26.1 |
| SSC_12605 | chr6  | 122419624 | 122419624 | C | T | 21.2 |
| SSC_12605 | chr6  | 143740082 | 143740082 | A | G | 28   |
| SSC_12605 | chr6  | 148282813 | 148282813 | G | T | 25   |
| SSC_12605 | chr6  | 40574804  | 40574804  | C | T | 29.2 |
| SSC_12605 | chr6  | 67067895  | 67067895  | T | C | 25.6 |
| SSC_12605 | chr7  | 14101770  | 14101770  | C | T | 21.4 |
| SSC_12605 | chr7  | 155665998 | 155665998 | T | G | 20.2 |
| SSC_12605 | chr7  | 156821142 | 156821142 | G | A | 28.4 |
| SSC_12605 | chr8  | 122228750 | 122228750 | G | T | 20.1 |
| SSC_12605 | chr8  | 124174622 | 124174622 | C | G | 20.6 |
| SSC_12605 | chr8  | 23844495  | 23844495  | G | A | 23.4 |
| SSC_12605 | chr8  | 37211547  | 37211547  | G | A | 28.7 |
| SSC_12605 | chr8  | 37478445  | 37478445  | G | A | 23.3 |
| SSC_12605 | chr8  | 64544103  | 64544103  | G | A | 25.4 |
| SSC_12605 | chr8  | 82285517  | 82285517  | C | T | 25.4 |
| SSC_12605 | chr9  | 116552467 | 116552467 | C | G | 34   |
| SSC_12605 | chr9  | 118422612 | 118422612 | G | A | 21.7 |
| K21       | chr22 | 27687672  | 27687672  | C | T | 20.4 |
| K21       | chr3  | 61335581  | 61335581  | A | C | 25.4 |
| K21       | chr3  | 61335633  | 61335633  | G | C | 20.1 |

|     |       |           |           |                                           |   |      |
|-----|-------|-----------|-----------|-------------------------------------------|---|------|
| K21 | chr5  | 123532440 | 123532440 | G                                         | T | 24.1 |
| K21 | chr5  | 9965489   | 9965489   | C                                         | T | 21.1 |
| K21 | chr6  | 50840399  | 50840399  | A                                         | G | 21.9 |
| K21 | chr7  | 41117784  | 41117784  | T                                         | C | 28.4 |
| K21 | chr1  | 83856628  | 83856629  | TG                                        | - | 22.4 |
| K21 | chr3  | 101042787 | 101042794 | CACACAC<br>C                              | - | 27.7 |
| K21 | chr5  | 56260260  | 56260260  | -                                         | T | 21.8 |
| K21 | chr15 | 56076095  | 56076095  | C                                         | T | 22.2 |
| K21 | chr20 | 20860914  | 20860914  | G                                         | A | 21   |
| K21 | chr6  | 923029    | 923029    | G                                         | A | 21.2 |
| K21 | chr9  | 132190774 | 132190774 | T                                         | C | 27.2 |
| K21 | chr9  | 132190776 | 132190776 | C                                         | T | 21.9 |
| K21 | chr9  | 132190777 | 132190777 | G                                         | A | 25   |
| K21 | chrX  | 40247640  | 40247640  | A                                         | C | 23   |
| K21 | chr15 | 56076080  | 56076091  | ACACACA<br>CACAC                          | - | 20.1 |
| K21 | chr5  | 61072614  | 61072619  | GGCTCC                                    | - | 20.2 |
| K21 | chr6  | 106357487 | 106357509 | GTGCATG<br>GCTGTGT<br>TTCAATAA<br>A       | - | 22   |
| K21 | chr6  | 106357512 | 106357540 | TTTATTTG<br>CAAAAAT<br>GGTAGGC<br>CAGATCT | - | 20.3 |
| K21 | chr1  | 4583312   | 4583312   | G                                         | A | 24   |
| K21 | chr1  | 53871085  | 53871085  | G                                         | C | 21.7 |
| K21 | chr1  | 73408392  | 73408392  | G                                         | A | 21.5 |
| K21 | chr10 | 113688392 | 113688392 | T                                         | C | 21.5 |
| K21 | chr11 | 133467379 | 133467379 | C                                         | A | 21.5 |
| K21 | chr12 | 122086571 | 122086571 | G                                         | A | 20.6 |
| K21 | chr13 | 40562721  | 40562721  | G                                         | A | 23   |
| K21 | chr13 | 53586912  | 53586912  | T                                         | C | 25.5 |
| K21 | chr13 | 53860192  | 53860192  | A                                         | G | 23.7 |
| K21 | chr13 | 54739462  | 54739462  | G                                         | A | 28.2 |
| K21 | chr14 | 101851050 | 101851050 | G                                         | A | 20.8 |
| K21 | chr14 | 61096535  | 61096535  | G                                         | A | 22.4 |
| K21 | chr14 | 98708466  | 98708466  | C                                         | A | 21   |
| K21 | chr14 | 99090043  | 99090043  | C                                         | T | 23   |
| K21 | chr15 | 36592921  | 36592921  | T                                         | C | 26.8 |
| K21 | chr15 | 70690919  | 70690919  | A                                         | T | 20.5 |
| K21 | chr18 | 19484595  | 19484595  | A                                         | G | 29   |

|     |       |           |           |   |   |      |
|-----|-------|-----------|-----------|---|---|------|
| K21 | chr18 | 76008014  | 76008014  | G | A | 23.7 |
| K21 | chr19 | 32514015  | 32514015  | T | C | 31   |
| K21 | chr2  | 118464682 | 118464682 | G | A | 26.2 |
| K21 | chr2  | 191069238 | 191069238 | T | C | 22.7 |
| K21 | chr3  | 112693983 | 112693983 | T | G | 28.1 |
| K21 | chr3  | 118572351 | 118572351 | C | T | 23.8 |
| K21 | chr3  | 125705514 | 125705514 | G | C | 21.1 |
| K21 | chr3  | 160295077 | 160295077 | C | T | 23.8 |
| K21 | chr3  | 51702481  | 51702481  | T | G | 20.8 |
| K21 | chr4  | 14342075  | 14342075  | T | C | 21.4 |
| K21 | chr4  | 182824707 | 182824707 | C | T | 22.8 |
| K21 | chr4  | 19056340  | 19056340  | C | T | 21.9 |
| K21 | chr4  | 24378792  | 24378792  | C | G | 22.4 |
| K21 | chr4  | 26860116  | 26860116  | G | A | 23.9 |
| K21 | chr4  | 30374172  | 30374172  | G | A | 20.5 |
| K21 | chr5  | 103344498 | 103344498 | C | A | 22.1 |
| K21 | chr5  | 103553737 | 103553737 | T | C | 21   |
| K21 | chr5  | 107154028 | 107154028 | T | C | 21.4 |
| K21 | chr5  | 109260124 | 109260124 | T | C | 22.3 |
| K21 | chr5  | 114649524 | 114649524 | G | A | 21.8 |
| K21 | chr5  | 123276353 | 123276353 | C | T | 23.2 |
| K21 | chr5  | 166069017 | 166069017 | C | T | 20.9 |
| K21 | chr5  | 166587688 | 166587688 | T | C | 22.2 |
| K21 | chr5  | 171086955 | 171086955 | C | G | 26.9 |
| K21 | chr5  | 171712758 | 171712758 | T | C | 27.8 |
| K21 | chr5  | 3115792   | 3115792   | G | T | 32   |
| K21 | chr5  | 4778242   | 4778242   | C | T | 27   |
| K21 | chr5  | 50814113  | 50814113  | C | T | 34   |
| K21 | chr5  | 61035688  | 61035688  | A | G | 28.8 |
| K21 | chr5  | 73787644  | 73787644  | T | A | 22   |
| K21 | chr5  | 86942915  | 86942915  | C | T | 28.2 |
| K21 | chr5  | 92145245  | 92145245  | A | C | 21.9 |
| K21 | chr6  | 106957825 | 106957825 | C | T | 22.7 |
| K21 | chr6  | 22558596  | 22558596  | A | G | 23.3 |
| K21 | chr6  | 48060847  | 48060847  | A | G | 24.4 |
| K21 | chr6  | 57675003  | 57675003  | A | G | 21.1 |
| K21 | chr6  | 7631966   | 7631966   | C | T | 20.1 |
| K21 | chr6  | 77104723  | 77104723  | G | A | 20.4 |
| K21 | chr6  | 88688027  | 88688027  | T | C | 27.2 |
| K21 | chr7  | 41174953  | 41174953  | A | G | 25.6 |
| K21 | chr8  | 10427001  | 10427001  | A | T | 27.7 |

|           |       |           |           |                                        |                  |      |
|-----------|-------|-----------|-----------|----------------------------------------|------------------|------|
| K21       | chr8  | 135352051 | 135352051 | G                                      | T                | 21   |
| K21       | chr8  | 20248897  | 20248897  | C                                      | T                | 22.9 |
| K21       | chr8  | 21481008  | 21481008  | C                                      | T                | 24.5 |
| K21       | chr9  | 108671886 | 108671886 | G                                      | C                | 21.7 |
| K21       | chr9  | 108978316 | 108978316 | C                                      | T                | 21.4 |
| K21       | chr9  | 118745741 | 118745741 | G                                      | A                | 25.2 |
| K21       | chr9  | 29591346  | 29591346  | A                                      | C                | 21.2 |
| K21       | chr9  | 34719492  | 34719492  | C                                      | A                | 20.7 |
| K21       | chr9  | 36809058  | 36809058  | A                                      | G                | 22   |
| SSC_12596 | chr5  | 148861846 | 148861846 | T                                      | C                | 21.4 |
| SSC_12596 | chr5  | 166473408 | 166473408 | A                                      | G                | 32   |
| SSC_12596 | chr6  | 105392777 | 105392777 | G                                      | A                | 26.1 |
| SSC_12596 | chr1  | 40157507  | 40157507  | -                                      | CCC              | 20.4 |
| SSC_12596 | chr6  | 99633447  | 99633447  | -                                      | AA               | 26.1 |
| SSC_12596 | chr7  | 41486661  | 41486661  | A                                      | -                | 20.2 |
| SSC_12596 | chr8  | 97126161  | 97126186  | GAGAGAG<br>AGAGAGT<br>GTGTGTG<br>TGTGT | -                | 25.7 |
| SSC_12596 | chr8  | 97126173  | 97126186  | GTGTGTG<br>TGTGTGT                     | -                | 26.7 |
| SSC_12596 | chr15 | 98525665  | 98525665  | G                                      | A                | 20   |
| SSC_12596 | chr16 | 73798270  | 73798270  | G                                      | T                | 20.9 |
| SSC_12596 | chr18 | 38192440  | 38192443  | GACC                                   | AACA             | 21.7 |
| SSC_12596 | chr2  | 143423002 | 143423002 | T                                      | C                | 20.2 |
| SSC_12596 | chr20 | 37967451  | 37967451  | A                                      | C                | 28.5 |
| SSC_12596 | chr20 | 52894853  | 52894853  | G                                      | T                | 24.7 |
| SSC_12596 | chr20 | 83275     | 83275     | T                                      | C                | 21.3 |
| SSC_12596 | chr3  | 75913410  | 75913410  | C                                      | G                | 24.7 |
| SSC_12596 | chr4  | 113424391 | 113424391 | C                                      | T                | 21.5 |
| SSC_12596 | chr4  | 150225458 | 150225458 | A                                      | T                | 31   |
| SSC_12596 | chr9  | 13447092  | 13447092  | T                                      | A                | 23.2 |
| SSC_12596 | chr11 | 114130425 | 114130428 | ACTC                                   | G                | 23.2 |
| SSC_12596 | chr16 | 54397489  | 54397489  | -                                      | AG               | 25.7 |
| SSC_12596 | chr17 | 68625736  | 68625742  | ACACACA                                | -                | 22.7 |
| SSC_12596 | chr2  | 180748704 | 180748704 | T                                      | -                | 25.1 |
| SSC_12596 | chr22 | 27954051  | 27954051  | -                                      | TGTGTGTG<br>TGTG | 20.5 |
| SSC_12596 | chr3  | 16356392  | 16356396  | TAAGA                                  | -                | 21.9 |
| SSC_12596 | chr5  | 152622997 | 152622997 | -                                      | CT               | 25.6 |
| SSC_12596 | chr5  | 61050514  | 61050526  | AGTCTAA<br>GATTAC                      | -                | 21   |

|           |       |           |           |    |    |      |
|-----------|-------|-----------|-----------|----|----|------|
| SSC_12596 | chr8  | 78870672  | 78870673  | AG | -  | 24.5 |
| SSC_12596 | chr1  | 115944429 | 115944429 | G  | A  | 21.7 |
| SSC_12596 | chr1  | 209515989 | 209515989 | G  | A  | 25.2 |
| SSC_12596 | chr1  | 230059707 | 230059707 | T  | G  | 20.3 |
| SSC_12596 | chr1  | 26492528  | 26492528  | G  | A  | 21.8 |
| SSC_12596 | chr10 | 124858110 | 124858110 | C  | T  | 23   |
| SSC_12596 | chr10 | 128395835 | 128395835 | C  | T  | 21.2 |
| SSC_12596 | chr10 | 130983110 | 130983110 | T  | A  | 28.7 |
| SSC_12596 | chr10 | 131121537 | 131121537 | A  | T  | 29.1 |
| SSC_12596 | chr10 | 131191050 | 131191050 | G  | A  | 26.3 |
| SSC_12596 | chr10 | 131215926 | 131215926 | A  | C  | 23.5 |
| SSC_12596 | chr10 | 66344166  | 66344166  | G  | A  | 20.8 |
| SSC_12596 | chr11 | 115390478 | 115390478 | G  | T  | 20.7 |
| SSC_12596 | chr11 | 119663944 | 119663944 | C  | T  | 22.6 |
| SSC_12596 | chr11 | 13255161  | 13255161  | C  | T  | 23   |
| SSC_12596 | chr11 | 13846999  | 13846999  | A  | G  | 25.2 |
| SSC_12596 | chr11 | 75940022  | 75940023  | AA | CC | 21.5 |
| SSC_12596 | chr11 | 80129375  | 80129375  | G  | C  | 21.2 |
| SSC_12596 | chr12 | 113886945 | 113886945 | G  | A  | 29.6 |
| SSC_12596 | chr12 | 19562222  | 19562222  | C  | T  | 22.2 |
| SSC_12596 | chr12 | 26281499  | 26281499  | T  | A  | 22.7 |
| SSC_12596 | chr12 | 54699087  | 54699087  | T  | C  | 26   |
| SSC_12596 | chr12 | 88842526  | 88842526  | C  | T  | 20.2 |
| SSC_12596 | chr13 | 34578005  | 34578005  | C  | A  | 21.5 |
| SSC_12596 | chr13 | 53991175  | 53991175  | T  | C  | 21.1 |
| SSC_12596 | chr13 | 60050575  | 60050575  | A  | G  | 28   |
| SSC_12596 | chr13 | 74802722  | 74802722  | A  | G  | 24.6 |
| SSC_12596 | chr13 | 79580367  | 79580367  | G  | T  | 24.3 |
| SSC_12596 | chr13 | 82081219  | 82081219  | A  | G  | 20.4 |
| SSC_12596 | chr14 | 66339078  | 66339078  | T  | C  | 21.6 |
| SSC_12596 | chr15 | 47341462  | 47341462  | A  | G  | 20.3 |
| SSC_12596 | chr15 | 60055405  | 60055405  | T  | C  | 31   |
| SSC_12596 | chr15 | 93833334  | 93833334  | C  | T  | 23   |
| SSC_12596 | chr15 | 96548743  | 96548743  | A  | T  | 32   |
| SSC_12596 | chr16 | 51026783  | 51026783  | G  | A  | 26.5 |
| SSC_12596 | chr16 | 51279310  | 51279310  | C  | A  | 28.4 |
| SSC_12596 | chr16 | 59033833  | 59033833  | A  | G  | 24   |
| SSC_12596 | chr16 | 60300340  | 60300340  | G  | A  | 21.7 |
| SSC_12596 | chr18 | 51628566  | 51628566  | A  | T  | 25.4 |
| SSC_12596 | chr2  | 151619390 | 151619390 | C  | A  | 25.9 |
| SSC_12596 | chr2  | 164331585 | 164331585 | C  | G  | 24   |

|           |       |           |           |   |   |      |
|-----------|-------|-----------|-----------|---|---|------|
| SSC_12596 | chr2  | 172957618 | 172957618 | C | T | 24.9 |
| SSC_12596 | chr2  | 176130181 | 176130181 | A | G | 23.5 |
| SSC_12596 | chr2  | 191069238 | 191069238 | T | C | 22.7 |
| SSC_12596 | chr2  | 22153244  | 22153244  | A | C | 22.5 |
| SSC_12596 | chr2  | 227559824 | 227559824 | T | C | 27.2 |
| SSC_12596 | chr2  | 37975711  | 37975711  | A | C | 26.4 |
| SSC_12596 | chr2  | 38001226  | 38001226  | C | T | 20.8 |
| SSC_12596 | chr20 | 11020374  | 11020374  | A | G | 21.1 |
| SSC_12596 | chr20 | 7306898   | 7306898   | C | T | 22.2 |
| SSC_12596 | chr21 | 18115979  | 18115979  | C | T | 24.2 |
| SSC_12596 | chr3  | 115056229 | 115056229 | T | A | 29.1 |
| SSC_12596 | chr4  | 100608406 | 100608406 | A | G | 22.7 |
| SSC_12596 | chr4  | 111125850 | 111125850 | C | A | 24.2 |
| SSC_12596 | chr4  | 127008059 | 127008059 | T | C | 23.5 |
| SSC_12596 | chr4  | 24378792  | 24378792  | C | G | 22.4 |
| SSC_12596 | chr4  | 27726615  | 27726615  | G | A | 21.1 |
| SSC_12596 | chr4  | 27759790  | 27759790  | G | T | 21.8 |
| SSC_12596 | chr4  | 42222902  | 42222902  | A | G | 25.6 |
| SSC_12596 | chr4  | 96756053  | 96756053  | T | C | 20.9 |
| SSC_12596 | chr5  | 154973014 | 154973014 | C | A | 22.9 |
| SSC_12596 | chr5  | 155113061 | 155113061 | A | C | 25.7 |
| SSC_12596 | chr5  | 157541929 | 157541929 | C | T | 27.7 |
| SSC_12596 | chr5  | 165337596 | 165337596 | T | C | 24.1 |
| SSC_12596 | chr5  | 165525147 | 165525147 | A | G | 23.3 |
| SSC_12596 | chr5  | 166028177 | 166028177 | T | G | 24.3 |
| SSC_12596 | chr5  | 2848501   | 2848501   | A | T | 23.9 |
| SSC_12596 | chr5  | 3187598   | 3187598   | T | C | 24.8 |
| SSC_12596 | chr5  | 44441702  | 44441702  | T | C | 21.2 |
| SSC_12596 | chr5  | 57367474  | 57367474  | C | T | 27.3 |
| SSC_12596 | chr6  | 57731529  | 57731529  | G | T | 20.2 |
| SSC_12596 | chr6  | 63165651  | 63165651  | G | A | 24.9 |
| SSC_12596 | chr6  | 91956739  | 91956739  | T | A | 24   |
| SSC_12596 | chr6  | 99606759  | 99606759  | A | G | 23.5 |
| SSC_12596 | chr7  | 106684276 | 106684276 | A | G | 23.9 |
| SSC_12596 | chr7  | 11357015  | 11357015  | T | C | 20.9 |
| SSC_12596 | chr7  | 114990639 | 114990639 | A | G | 23.8 |
| SSC_12596 | chr7  | 115340835 | 115340835 | C | T | 25.7 |
| SSC_12596 | chr7  | 13842239  | 13842239  | C | T | 28   |
| SSC_12596 | chr7  | 13866759  | 13866759  | T | C | 21.7 |
| SSC_12596 | chr7  | 13874391  | 13874391  | A | G | 22.1 |
| SSC_12596 | chr7  | 13879370  | 13879370  | T | G | 25.7 |

|           |      |           |           |   |   |      |
|-----------|------|-----------|-----------|---|---|------|
| SSC_12596 | chr7 | 45499145  | 45499145  | C | A | 20.5 |
| SSC_12596 | chr8 | 124297256 | 124297256 | A | G | 22.6 |
| SSC_12596 | chr8 | 135046560 | 135046560 | T | C | 22.7 |
| SSC_12596 | chr8 | 136342563 | 136342563 | T | C | 21.5 |
| SSC_12596 | chr8 | 78361199  | 78361199  | G | C | 20.2 |
| SSC_12596 | chr9 | 16278494  | 16278494  | G | C | 36   |
| SSC_12596 | chr9 | 27763002  | 27763002  | G | T | 21.8 |
| SSC_12596 | chr9 | 30243440  | 30243440  | T | C | 24.7 |
| SSC_12596 | chr9 | 78473530  | 78473530  | G | T | 21.3 |
| SSC_12596 | chr9 | 83995471  | 83995471  | A | C | 23   |
| SSC_12596 | chrX | 17351169  | 17351169  | C | A | 22.9 |
| SSC_12596 | chrX | 97109589  | 97109589  | A | C | 34   |
